# Supplementary material for: European Society of Cardiology smartphone and tablet applications for patients with atrial fibrillation and their health care providers
Source: Oxford University Press journal article supplement (doi:10.1093/europace/eux299), 2017-10-10
Supplement: eux299_supp.zip [file eux299_supp.zip]

Wednesday, 10 May 2017

Dr. Dipak Kotecha  
Institute of Cardiovascular Sciences  
University of Birmingham  
Medical School  
Vincent Drive  
Birmingham B15 2TT  
UK

Dear Doctor Kotecha,

On behalf of the EHRA Executive Board, I am very happy to announce you the decision we have made concerning the endorsement of your document on "ESC smartphone and tablet applications for patients with atrial fibrillation and their healthcare providers".

Looking to reading the published document and should you need any support please do not hesitate to let us know.

Best regards,

Prof. Gerhard Hindricks  
EHRA President (2015-2017)
